# Supplementary material
Source: publisher site journal article supplement (https://www.degruyterbrill.com/publication/journal_key/HTMP/downloadAsset/HTMP_Manuscript%20Template.docx)
Supplement: Supplementary file 1 [file HTMP_Manuscript%20Template.docx]

**Title of the paper**

(title should be informative, specific, and up to 75 characters, including spaces)

**Running title of the paper**

(short version of the title; up to 50 characters, including spaces)

Name1 Surname11, Name2 Surname22, and Name3 Surname31,2,*

1 first affiliation

2 second affiliation

* Corresponding author: please insert email address here (there can be more than one corresponding author)

**Abstract:** Text of the abstract (up to 200 words; should be understandable without reference to the text – please do not use citations and references, avoid specialist abbreviations and symbols)

**Keywords:** keyword1, keyword2, keyword3… (up to 5 keywords separated by commas)

(for details please see Instructions for Authors available on the *e-Polymers* website)

**1 Introduction**

Text text text text text text. Text text text text text text text text text text. Text text text text text text text (see Figure 1). Text text text text text text text text text [1], text text text text text [1,2]. Text text text text text [3-7] text text…

<Location of Figure 1> (locations of figures and tables should be clearly indicated in the text)

**2 Materials and methods**

Text text text text text text text text text in Figure 2. Text text text 35 mL text text (4,8-10). Text text text text text text tex (see Table 1). Text text text 2 h text text 30 min text text 10 s. Text text text text text text text text…W/mK, W/m x K

<Location of Figure 2>

<Location of Table 1>

**2.1 Title of subsection**

Text text text text text text text 7ºC text. Text text text text text text text text text text text text text text text text in Eq. 1.

a2 = b2 + c2 (1)

**3 Results**

Text text text text text text text. Text text text text in Table 2. Text text text text text text text text text 23%, text text text text text (11). Text text text text text in Scheme 1 text text text.

<Location of Table 2>

<Location of Scheme 1>

**4 Discussion**

Text text text text text text text. Text text text text. Text text text text text text text text text, text text text text text. Text text text text text text text text text text. Text text text text text text text text text text text.

**5 Conclusions**

Text text text text text text text. Text text text text. Text text text text text text text text text, text text text text text. Text text text text text text text text text text. Text text text text text text text text text text text.

**Acknowledgement**

*Should be included if applicable.*

F**unding information**

*Obligatory* (If no funding: Authors state no funding involved.).

**Author contribution**

*Obligatory* (please include proper contribution categories for each author; applicable categories are listed on this website: <https://casrai.org/credit/>).

This section should be prepared according to the following scheme (an example):

**John Smith:** Writing – original draft, Writing – review & editing, Methodology, Formal Analysis; **Martha Poppins:** Writing – original draft, Formal Analysis, Visualization, Project administration; **Yan Zhang:** Resources; …

**Conflict of interest**

*Obligatory* (If no conflict: Authors state no conflict of interest.).

**Data availability statement**

*Should be included if applicable* (for details please see the file “Author Statements” in the Supplementary Materials section on the [*HTMP web page*](https://www.degruyter.com/journal/key/HTMP/html)).

Other statements (e.g. Informed consent, Authorization for the use of human subjects, Authorization for the use of experimental animals) should be elaborated in the methodological section of your manuscript.

**References**

**General comments on that matter**

1. Only references that have been cited in the body of the article should be included.

2. Organization: In the TRR Style, entries are listed and numbered in the order that they appear in the text.

3. The year is placed after the issue number or volume number (if issue number is not applicable), followed by a comma.

4. Authors’ names: First author's name is followed by initials for first and middle names. In case of more than one author, before the surnames are initials for first and middle names, respectively. The initials of given names and surname are separated by a comma only in case of the first author.

5. Include all authors’ names if an article has up to six authors; for work with seven or more authors, list the first six names followed by a comma and “et al.”

6. For articles with two authors, please use “and” to separate the authors’ names.

7. Formatting titles: Please do italicize names of journals.

8. Titles of books and articles: Only the first letter of the title’s first word and any proper nouns should be capitalized. Do not enclose article titles in quotation marks.

9. The full name of any journal is required.

10. Page ranges: Include page ranges for articles in journals/magazines/newspapers and for chapters in books. When an article appears on discontinuous pages, list all pages or page ranges, separated by commas, e.g., pp. 145-149, 162-174. Please use the abbreviation “pp.” before the numbers (pp. 63-90).

**Journal articles**

A journal article with 1 author

[1] Naziri, E., Contribution of tocopherols and squalene to the oxidative stability of cold-pressed pumpkin seed oil (Cucurbita pepo L.). *European Journal of Lipid Science Technology*, Vol. 118, No. 6, 2016, pp. 898–905.

A journal article with 2 authors

[2] Abend, S. M., and N. Kulish. The psychoanalytic method from an epistemological viewpoint. *International Journal of Psychoanalogy*, Vol. 83, Part 2, 2002, pp. 491–495.

A journal article with more than 6 authors

[3] Dhananjaya, B. L., A. Nataraju, R. Rajesh, C. D. Raghavendra Gowda, B. K. Sharath, B. S. Vishwanath et al. Anticoagulant effect of Naja naja venom 5'nucleotidase: demonstration through the use of novel specific inhibitor, vanillic acid. *Toxicon*, Vol. 48, No. 4, 2006, pp. 411–421.

A Retraction article

[4] Feifel, D., C. Y. Moutier, and W. Perry. Safety and tolerability of a rapidly escalating dose-loading regimen for risperidone. Journal of Clinical Psychiatry, Vol. 63, No. 2, 2002, p. 169; Retraction of: Feifel, D., C. Y. Moutier, W. Perry. *Journal of Clinical Psychiatry*, Vol. 61, No. 12, 2000, pp. 909–911.

Electronic Journal Articles and Preprints

[5] Dionne, M. S. and D. S. Schneider. Screening the immune system. *Genome Biology*, 2002, http://genomebiology.com/2002/3/4/reviews/1010.

An article in press

[6] Kulig, P., B. A. Zabel, G. Dubin, S. J. Allen, T. Ohyama, J. Potempa et al. Staphylococcus aureus-derived staphopain B, a potent cysteine protease activator of plasma chemerin, *Journal of Immunology*, (in press), DOI: 12.3412/01.

**Books and book chapters**

An authored book

[7] Hollenbach M. Smart Materials. John Wiley & Sons, Inc., Hoboken, NJ, 2019.

An edited book

[8] Mathis, T., and L. G. Prose, Eds. Intelligent Materials and Structures. Springer, New York, NY, 2010.

A chapter in an authored book

[9] Sambrook, J. and D. W. Russell. Gastric emptying of a nutritionally balanced liquid diet. In Molecular cloning - a laboratory manual, 3rd edn, Daniel, E. E. and M. Godet, Eds, Cold Spring Harbor Laboratory Press, Cold Spring Harbor, 2001, pp. 83–92.

Conference proceedings

[10] Jones, R. T. Intelligent Materials and Structures. Proceedings of the VII International Conference on Molten Slags, Fluxes and Salts, SAIMM, January 26–28, 2004, Cape Town Institute of Materials, 2005, pp. 363–376.

Theses and dissertations

Theses including Ph.D. dissertations, Master's theses or Bachelor theses follow the basic format outlined below.

Doctoral dissertation

[11] Agutter, A. J. Analysis of sigma factors in S. aureus. Doctoral dissertation. Edinburgh University, Edinburgh, 1995.

Newspaper articles

Unlike scholarly journals, newspapers do not usually have a volume and issue number. Instead, the full date and page number are required for a correct reference.

[12] Sherwin, J. A. The post-genomic era, The Times, July 13, 2007, p. 1

**Reports and patents**

Report

[14] Government Accountability Office. Internal Revenue Service: 2001 Tax Filing Season, Systems Modernization, and Security of Electronic Filing. Publication GAO-01-595T. U.S. Government Printing Office, Washington, DC, 2001.

Patent

[13] Agutter, A. J. Analysis of sigma factors in S. aureus. U.S. Patent No. 1232, 1995.

**Personal Communication**

Please do not include references to personal communication (e.g., letters, phone calls, conversations, text messages, emails, and interviews) in your reference list. Instead, we recommend placing them within the body of the paper and acknowledge them in a “Notes” section.

In-text Citation:

… although this is not an easy thing to do (2008 letter from S Neifer to me), it is well worth the effort.

**Figure and Scheme captions**

**Figure 1:** Figure caption.

**Figure 2:** Figure caption.

**Scheme 1:** Scheme caption.

- Figures, schemes, and tables should be numbered consecutively using Arabic numerals and referred to in the text by number, e.g. “in Figure 1” or “(see Figure 1)”; “in Table 1” or “(see Table 1)”, etc.
- For details about figures and tables please see Instructions for Authors (pages 7-8).

**Figures and Schemes** (each figure and scheme on a separate page)

**Tables and Table captions** (each table with its caption on a separate page)

**Appendix** (optional)

**Supplementary material** (if applicable – in a separate WORD file)

**GENERAL RULES**

- text files allowed: MS Word (.DOC, .DOCX),
- graphic files should be included in the DOC/DOCX manuscript file,
- graphic files can be also submitted as separated files – allowed formats: EPS, BMP, JPG, TIFF, GIF,
- pages must be numbered consecutively,
- hyphenation, automatic word-wrap and hard returns within paragraphs are not allowed,
- font size should be no smaller than 12,
- footnotes and endnotes should be avoided,
- do not create symbols as graphics or do not use special fonts that are external to your word processing program,
- for further details please see Instructions for Authors.
